# Supplementary material for: A framework for constructing linear free energy relationships to design molecular transition metal catalysts
Source: Royal Society of Chemistry journal article supplement (doi:10.1039/d1cp02278d), 2021-01-01
Supplement: d1cp02278d1.pdf [file d1cp02278d1.pdf]

## Supporting Information

# A framework for constructing linear free energy relationships to design molecular transition metal catalysts

Zhenhuo Lan,<sup>a</sup> and Shaama Mallikarjun Sharada<sup>\*a,b</sup>

### 1 Asymmetric Systems

Table 1 shows descriptors, LFER, and DFT barriers for **A1-A38** asymmetrically substituted dicopper systems.

Table 1: Sum of four Hammett parameters  $\sigma_p$ , bite angles  $\theta$  ( $^\circ$ ) and Sterimol parameters B1 ( $\text{\AA}$ ), BS barriers  $\Delta E_{DFT}^\ddagger$  calculated by DFT ( $\omega$ B97X-D/srsc/6-311+G\*) and predicted by LFER model  $\Delta E_{LFER}^\ddagger$  for 38 asymmetrically substituted catalysts (barriers in kJ/mol)

| Index | $\sum \sigma_p$ | $\theta_1$ | $\theta_2$ | B1 <sub>1</sub> | B1 <sub>2</sub> | $\Delta E_{DFT}^\ddagger$ | $\Delta E_{LFER}^\ddagger$ |
|-------|-----------------|------------|------------|-----------------|-----------------|---------------------------|----------------------------|
| A1    | -0.54           | 96.904     | 95.999     | 1.59            | 1.68            | 83.3                      | 87.3                       |
| A2    | -0.34           | 95.159     | 95.142     | 1.72            | 1.68            | 84.6                      | 85.5                       |
| A3    | 1.10            | 96.230     | 96.264     | 1.88            | 1.68            | 73.8                      | 81.2                       |
| A4    | 1.56            | 97.011     | 97.396     | 1.59            | 1.69            | 71.3                      | 75.2                       |
| A5    | -0.88           | 98.156     | 98.476     | 1.72            | 1.63            | 94.6                      | 94.9                       |
| A6    | 0.56            | 99.521     | 97.618     | 1.76            | 1.73            | 73.1                      | 88.5                       |
| A7    | 1.02            | 98.153     | 96.147     | 1.72            | 1.63            | 74.4                      | 79.9                       |
| A8    | 0.76            | 93.548     | 97.384     | 1.72            | 1.91            | 79.0                      | 83.0                       |
| A9    | 1.22            | 95.367     | 96.050     | 1.73            | 1.64            | 70.5                      | 75.9                       |
| A10   | 2.66            | 97.254     | 97.866     | 1.91            | 1.89            | 60.3                      | 78.0                       |
| A11   | 0.55            | 95.913     | 96.567     | 1.68            | 1.64            | 83.8                      | 80.5                       |
| A12   | -0.17           | 95.041     | 96.555     | 1.69            | 1.66            | 98.3                      | 84.8                       |
| A13   | 0.78            | 96.617     | 96.773     | 1.69            | 1.61            | 70.0                      | 79.6                       |
| A14   | -0.27           | 96.455     | 96.574     | 1.66            | 1.61            | 92.4                      | 85.6                       |
| A15   | 1.10            | 96.797     | 96.302     | 1.67            | 1.68            | 84.0                      | 78.1                       |
| A16   | -0.34           | 94.998     | 95.488     | 1.64            | 1.67            | 94.9                      | 84.1                       |
| A17   | 1.56            | 95.890     | 97.397     | 1.64            | 1.68            | 63.2                      | 74.7                       |
| A18   | -0.54           | 96.501     | 96.587     | 1.66            | 1.67            | 95.1                      | 88.5                       |
| A19   | 1.10            | 96.466     | 96.829     | 1.64            | 1.89            | 82.4                      | 81.5                       |
| A20   | -0.34           | 95.610     | 96.562     | 1.71            | 1.64            | 89.2                      | 86.6                       |
| A21   | 1.56            | 96.229     | 96.658     | 1.61            | 1.65            | 68.0                      | 73.2                       |
| A22   | -0.54           | 98.769     | 97.079     | 1.65            | 1.62            | 89.3                      | 90.4                       |
| A23   | 1.65            | 97.383     | 94.966     | 1.79            | 1.66            | 78.7                      | 75.4                       |
| A24   | -0.51           | 95.664     | 96.212     | 1.72            | 1.68            | 94.5                      | 88.3                       |
| A25   | 2.33            | 96.637     | 97.239     | 1.69            | 1.59            | 69.7                      | 69.5                       |
| A26   | -0.81           | 96.648     | 98.809     | 1.69            | 1.66            | 93.0                      | 93.2                       |
| A27   | 2.66            | 97.611     | 96.867     | 1.64            | 1.91            | 71.7                      | 72.9                       |
| A28   | 0.76            | 93.188     | 97.381     | 1.71            | 1.91            | 75.9                      | 82.4                       |
| A29   | 1.22            | 93.739     | 97.388     | 1.65            | 1.59            | 71.6                      | 73.2                       |
| A30   | 0.56            | 98.961     | 97.223     | 1.64            | 1.87            | 80.2                      | 87.8                       |
| A31   | -0.88           | 98.788     | 96.999     | 1.64            | 1.72            | 90.8                      | 94.2                       |
| A32   | 1.02            | 98.827     | 96.645     | 1.64            | 1.61            | 75.7                      | 79.4                       |
| A33   | -0.44           | 96.578     | 96.007     | 1.65            | 1.62            | 90.8                      | 86.2                       |
| A34   | 0.28            | 96.537     | 96.460     | 1.66            | 1.89            | 87.3                      | 86.9                       |
| A35   | 0.51            | 96.153     | 97.078     | 1.66            | 1.60            | 85.5                      | 80.5                       |
| A36   | 0.38            | 95.836     | 96.162     | 1.63            | 1.76            | 90.8                      | 82.3                       |
| A37   | 0.61            | 95.652     | 95.677     | 1.63            | 1.66            | 93.1                      | 78.4                       |
| A38   | 1.33            | 96.687     | 95.739     | 1.66            | 1.67            | 82.2                      | 75.5                       |

<sup>a</sup> Mork Family Department of Chemical Engineering and Materials Science,

<sup>b</sup> Department of Chemistry, University of Southern California, Los Angeles CA 90089, USA.

E-mail: ssharada@usc.edu

## 2 Transferability Tests

Table 2 lists LFER descriptors calculated using **IS** geometries at various levels of theory.

Table 2: Bite angles  $\theta$  ( $^\circ$ ), Sterimol parameters B1 ( $\text{\AA}$ ), BS DFT barriers,  $\Delta E_{DFT}^\ddagger$ , using various levels of theory and LFER model predictions  $\Delta E_{LFER}^\ddagger$  for 11 symmetric substituted catalysts (kJ/mol). Hammett parameters are based on experiment and therefore invariant with level of theory

|                                            | $X_{im}$                         | $\theta_1$ | $\theta_2$ | B1 <sub>1</sub> | B1 <sub>2</sub> | $\Delta E_{DFT}^\ddagger$ | $\Delta E_{LFER}^\ddagger$ |
|--------------------------------------------|----------------------------------|------------|------------|-----------------|-----------------|---------------------------|----------------------------|
| PBE0/<br>6-311+G*<br>(Cu: srsc)            | N(CH <sub>3</sub> ) <sub>2</sub> | 97.871     | 94.480     | 1.96            | 1.84            | 82.0                      | 104.1                      |
|                                            | NHCH <sub>3</sub>                | 96.969     | 97.150     | 1.50            | 1.50            | 82.1                      | 88.4                       |
|                                            | NH <sub>2</sub>                  | 96.979     | 97.235     | 1.57            | 1.55            | 73.6                      | 89.6                       |
|                                            | OH                               | 98.888     | 98.876     | 1.66            | 1.65            | 71.5                      | 89.1                       |
|                                            | OCH <sub>3</sub>                 | 96.866     | 98.978     | 1.65            | 1.64            | 86.6                      | 84.0                       |
|                                            | CH <sub>3</sub>                  | 96.752     | 92.646     | 1.6             | 1.71            | 71.9                      | 74.8                       |
|                                            | H                                | 96.102     | 96.111     | 1.66            | 1.65            | 73.4                      | 73.4                       |
|                                            | CHO                              | 95.333     | 95.248     | 1.62            | 1.61            | 67.2                      | 59.1                       |
|                                            | COOH                             | 97.618     | 97.561     | 1.62            | 1.62            | 62.6                      | 63.5                       |
|                                            | CF <sub>3</sub>                  | 95.958     | 98.341     | 1.91            | 1.77            | 54.4                      | 67.7                       |
|                                            | NO <sub>2</sub>                  | 97.336     | 97.750     | 1.62            | 1.61            | 45.2                      | 54.5                       |
| SCAN0/<br>6-311+G*<br>(Cu: srsc)           | N(CH <sub>3</sub> ) <sub>2</sub> | 94.580     | 98.370     | 1.95            | 1.92            | 62.0                      | 85.6                       |
|                                            | NHCH <sub>3</sub>                | 96.874     | 96.742     | 1.59            | 1.57            | 65.0                      | 70.2                       |
|                                            | NH <sub>2</sub>                  | 97.006     | 97.099     | 1.57            | 1.59            | 56.5                      | 69.7                       |
|                                            | OH                               | 98.724     | 98.938     | 1.66            | 1.68            | 57.8                      | 69.1                       |
|                                            | OCH <sub>3</sub>                 | 98.754     | 98.896     | 1.67            | 1.70            | 75.6                      | 66.9                       |
|                                            | CH <sub>3</sub>                  | 92.672     | 92.937     | 1.72            | 1.71            | 50.6                      | 52.4                       |
|                                            | H                                | 95.678     | 95.803     | 1.65            | 1.62            | 51.4                      | 51.4                       |
|                                            | CHO                              | 95.278     | 95.264     | 1.62            | 1.63            | 51.2                      | 39.0                       |
|                                            | COOH                             | 97.469     | 97.316     | 1.62            | 1.61            | 47.7                      | 42.4                       |
|                                            | CF <sub>3</sub>                  | 95.536     | 97.808     | 1.79            | 1.88            | 41.6                      | 46.0                       |
|                                            | NO <sub>2</sub>                  | 97.179     | 96.610     | 1.65            | 1.59            | 30.4                      | 32.9                       |
| $\omega$ B97X-V/<br>6-311+G*<br>(Cu: srsc) | N(CH <sub>3</sub> ) <sub>2</sub> | 95.003     | 97.866     | 1.95            | 1.78            | 109.4                     | 131.5                      |
|                                            | NHCH <sub>3</sub>                | 96.982     | 96.908     | 1.58            | 1.57            | 114.3                     | 118.9                      |
|                                            | NH <sub>2</sub>                  | 97.133     | 97.376     | 1.60            | 1.59            | 105.9                     | 119.2                      |
|                                            | OH                               | 97.614     | 97.185     | 1.67            | 1.66            | 106.3                     | 114.3                      |
|                                            | OCH <sub>3</sub>                 | 98.704     | 98.828     | 1.66            | 1.66            | 127.1                     | 114.4                      |
|                                            | CH <sub>3</sub>                  | 93.002     | 96.016     | 1.75            | 1.63            | 102.3                     | 103.7                      |
|                                            | H                                | 96.014     | 95.926     | 1.61            | 1.65            | 100.3                     | 100.3                      |
|                                            | CHO                              | 95.535     | 95.406     | 1.60            | 1.60            | 100.4                     | 87.0                       |
|                                            | COOH                             | 97.633     | 97.550     | 1.62            | 1.61            | 95.2                      | 91.3                       |
|                                            | CF <sub>3</sub>                  | 97.948     | 95.579     | 1.91            | 1.77            | 79.6                      | 94.9                       |
|                                            | NO <sub>2</sub>                  | 97.185     | 97.614     | 1.59            | 1.64            | 77.3                      | 82.3                       |
| $\omega$ B97X-D/<br>6-31G*                 | N(CH <sub>3</sub> ) <sub>2</sub> | 94.638     | 97.840     | 1.96            | 1.79            | 159.8                     | 185.2                      |
|                                            | NHCH <sub>3</sub>                | 96.649     | 96.556     | 1.63            | 1.58            | 164.8                     | 173.0                      |
|                                            | NH <sub>2</sub>                  | 96.665     | 96.743     | 1.60            | 1.58            | 160.0                     | 171.6                      |
|                                            | OH                               | 98.090     | 98.219     | 1.67            | 1.67            | 159.7                     | 169.9                      |
|                                            | OCH <sub>3</sub>                 | 97.904     | 98.066     | 1.69            | 1.70            | 177.0                     | 167.7                      |
|                                            | CH <sub>3</sub>                  | 92.881     | 96.125     | 1.72            | 1.71            | 158.2                     | 158.4                      |
|                                            | H                                | 95.706     | 95.534     | 1.63            | 1.64            | 153.4                     | 153.4                      |
|                                            | CHO                              | 95.272     | 95.261     | 1.61            | 1.63            | 155.4                     | 141.1                      |
|                                            | COOH                             | 97.442     | 96.944     | 1.61            | 1.62            | 145.0                     | 144.2                      |
|                                            | CF <sub>3</sub>                  | 97.961     | 95.365     | 1.89            | 1.77            | 144.4                     | 148.1                      |
|                                            | NO <sub>2</sub>                  | 97.279     | 97.168     | 1.60            | 1.60            | 128.8                     | 135.1                      |
| $\omega$ B97X-D/<br>def2-SVP               | N(CH <sub>3</sub> ) <sub>2</sub> | 98.896     | 94.725     | 1.90            | 1.78            | 71.4                      | 99.0                       |
|                                            | NHCH <sub>3</sub>                | 97.294     | 97.262     | 1.55            | 1.56            | 85.6                      | 86.5                       |
|                                            | NH <sub>2</sub>                  | 97.576     | 97.459     | 1.57            | 1.57            | 79.6                      | 86.4                       |

Continued on next page

Table 2: Bite angles  $\theta$  ( $^\circ$ ), Sterimol parameters  $B1$  ( $\text{\AA}$ ), BS DFT barriers,  $\Delta E_{DFT}^\ddagger$ , using various levels of theory and LFER model predictions  $\Delta E_{LFER}^\ddagger$  for 11 symmetric substituted catalysts (kJ/mol). Hammett parameters are based on experiment and therefore invariant with level of theory

|                               | $X_{im}$                         | $\theta_1$ | $\theta_2$ | $B1_1$ | $B1_2$ | $\Delta E_{DFT}^\ddagger$ | $\Delta E_{LFER}^\ddagger$ |
|-------------------------------|----------------------------------|------------|------------|--------|--------|---------------------------|----------------------------|
|                               | OH                               | 99.589     | 99.445     | 1.66   | 1.67   | 74.3                      | 86.5                       |
|                               | OCH <sub>3</sub>                 | 99.488     | 99.385     | 1.68   | 1.7    | 91.6                      | 84.5                       |
|                               | CH <sub>3</sub>                  | 96.593     | 93.017     | 1.71   | 1.73   | 70.1                      | 73.0                       |
|                               | H                                | 96.362     | 96.217     | 1.64   | 1.62   | 68.5                      | 68.5                       |
|                               | CHO                              | 95.477     | 95.455     | 1.62   | 1.62   | 63.5                      | 55.3                       |
|                               | COOH                             | 96.883     | 97.575     | 1.63   | 1.63   | 62.2                      | 58.7                       |
|                               | CF <sub>3</sub>                  | 98.317     | 96.102     | 1.90   | 1.77   | 53.8                      | 63.3                       |
|                               | NO <sub>2</sub>                  | 96.992     | 97.136     | 1.64   | 1.60   | 44.4                      | 49.3                       |
| $\omega$ B97X-D/<br>def2-SVPD | N(CH <sub>3</sub> ) <sub>2</sub> | 94.882     | 99.079     | 1.9    | 1.76   | 82.0                      | 101.8                      |
|                               | NHCH <sub>3</sub>                | 96.976     | 96.910     | 1.59   | 1.59   | 88.5                      | 89.7                       |
|                               | NH <sub>2</sub>                  | 97.112     | 97.103     | 1.60   | 1.59   | 80.9                      | 89.2                       |
|                               | OH                               | 98.977     | 99.266     | 1.66   | 1.67   | 74.6                      | 88.4                       |
|                               | OCH <sub>3</sub>                 | 98.894     | 99.134     | 1.68   | 1.71   | 95.0                      | 86.5                       |
|                               | CH <sub>3</sub>                  | 92.874     | 96.615     | 1.76   | 1.73   | 75.4                      | 76.5                       |
|                               | H                                | 95.866     | 96.255     | 1.65   | 1.63   | 71.2                      | 71.2                       |
|                               | CHO                              | 95.165     | 95.127     | 1.63   | 1.63   | 68.8                      | 57.7                       |
|                               | COOH                             | 97.499     | 97.088     | 1.62   | 1.62   | 64.8                      | 61.2                       |
|                               | CF <sub>3</sub>                  | 95.474     | 98.349     | 1.89   | 1.77   | 61.7                      | 65.2                       |
|                               | NO <sub>2</sub>                  | 97.399     | 97.191     | 1.64   | 1.60   | 47.5                      | 52.6                       |

### 3 Sensitivity Analysis

Figure 1 shows the results of SOBOL sensitivity analysis, indicating the dependence of model performance on the three sets of descriptors chosen to construct the LFER.

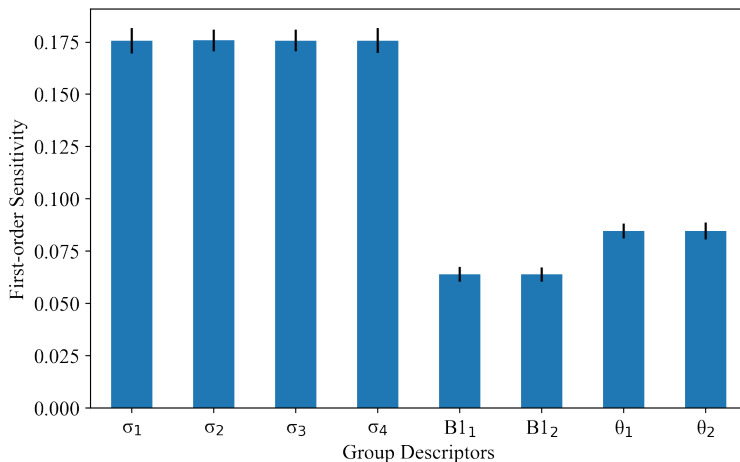

Figure 1: LFER model sensitivity analysis to interaction ( $\sigma_p$ ) and strain ( $B1, \theta$ ) descriptors.

## 4 LFER Model Predictions: Interaction & Strain Energies

Table 3 shows differences between LFER and DFT values of ASM components for A1-A38. Catalyst and substrate strain terms are listed in Table 4 for the analysis of sources of model error.

Table 3: Differences between LFER and DFT-based ( $\omega$ B97X-D/srsc, 6-311+G\*)  $\Delta E_{INT}$ ,  $\Delta E_{STR}$ , and  $\Delta E^\ddagger$  (kJ/mol) for **A1-A38**. ASM components for the outliers (Main text, Figure 4) for which the magnitudes of LFER deviations exceed 10 kJ/mol are highlighted in boldface.

| Index      | $\Delta E_{INT,LFER}-\Delta E_{INT,DFT}$ | $\Delta E_{STR,LFER}-\Delta E_{STR,DFT}$ | $\Delta E_{LFER}^\ddagger-\Delta E_{DFT}^\ddagger$ |
|------------|------------------------------------------|------------------------------------------|----------------------------------------------------|
| A1         | 4.7                                      | -0.7                                     | 4.0                                                |
| A2         | 6.3                                      | -5.5                                     | 0.8                                                |
| A3         | -3.1                                     | 10.4                                     | 7.4                                                |
| A4         | -17.9                                    | 21.8                                     | 3.9                                                |
| A5         | -0.6                                     | 0.9                                      | 0.3                                                |
| <b>A6</b>  | <b>-7.0</b>                              | <b>22.4</b>                              | <b>15.4</b>                                        |
| A7         | -12.4                                    | 17.9                                     | 5.5                                                |
| A8         | -1.7                                     | 5.6                                      | 3.9                                                |
| A9         | -12.8                                    | 18.2                                     | 5.4                                                |
| <b>A10</b> | <b>-17.1</b>                             | <b>34.8</b>                              | <b>17.7</b>                                        |
| A11        | -2.0                                     | -1.3                                     | -3.3                                               |
| <b>A12</b> | <b>1.1</b>                               | <b>-14.5</b>                             | <b>-13.4</b>                                       |
| A13        | -4.2                                     | 13.8                                     | 9.6                                                |
| A14        | -1.6                                     | -5.2                                     | -6.8                                               |
| A15        | -5.8                                     | -0.1                                     | -5.9                                               |
| <b>A16</b> | <b>6.9</b>                               | <b>-17.7</b>                             | <b>-10.8</b>                                       |
| <b>A17</b> | <b>-9.6</b>                              | <b>21.1</b>                              | <b>11.5</b>                                        |
| A18        | 0.6                                      | -7.2                                     | -6.5                                               |
| A19        | -4.2                                     | 3.2                                      | -0.9                                               |
| A20        | 7.6                                      | -10.2                                    | -2.6                                               |
| A21        | -13.2                                    | 18.4                                     | 5.2                                                |
| A22        | -0.6                                     | 1.7                                      | 1.1                                                |
| A23        | -12.2                                    | 9.0                                      | -3.3                                               |
| A24        | 3.7                                      | -9.9                                     | -6.3                                               |
| A25        | -19.6                                    | 19.5                                     | -0.2                                               |
| A26        | 1.2                                      | -0.9                                     | 0.3                                                |
| A27        | -17.9                                    | 19.0                                     | 1.1                                                |
| A28        | -1.5                                     | 8.0                                      | 6.5                                                |
| A29        | -9.0                                     | 10.6                                     | 1.6                                                |
| A30        | -6.9                                     | 14.5                                     | 7.6                                                |
| A31        | 1.3                                      | 2.0                                      | 3.3                                                |
| A32        | -13.8                                    | 17.4                                     | 3.7                                                |
| A33        | -2.8                                     | -1.8                                     | -4.6                                               |
| A34        | -9.2                                     | 8.8                                      | -0.4                                               |
| A35        | -10.9                                    | 5.9                                      | -5.0                                               |
| A36        | -7.4                                     | -1.0                                     | -8.4                                               |
| <b>A37</b> | <b>-7.7</b>                              | <b>-7.1</b>                              | <b>-14.7</b>                                       |
| A38        | -8.4                                     | 1.7                                      | -6.7                                               |

Table 4: Catalyst ( $\Delta E_{STR,CAT}$ ) and substrate strain energies ( $\Delta E_{STR,SUB}$ ) in kJ/mol for **S1-S11** and **A1-A38** calculated using EDA fragment energy differences ( $\omega$ B97X-D/srsc, 6-311+G\*).

| Index | $\Delta E_{STR,SUB}$ | $\Delta E_{STR,CAT}$ |
|-------|----------------------|----------------------|
| S1    | 121.3                | 61.2                 |
| S2    | 131.3                | 67.2                 |
| S3    | 130.1                | 63.9                 |
| S4    | 128.1                | 63.2                 |
| S5    | 132.0                | 74.2                 |
| S6    | 139.1                | 57.0                 |
| S7    | 126.8                | 62.0                 |
| S8    | 126.5                | 74.0                 |
| S9    | 124.2                | 52.1                 |
| S10   | 114.0                | 68.0                 |
| S11   | 111.1                | 51.1                 |
| A1    | 133.0                | 61.2                 |
| A2    | 136.1                | 62.5                 |
| A3    | 123.9                | 63.0                 |
| A4    | 116.1                | 57.1                 |
| A5    | 127.9                | 67.2                 |
| A6    | 128.7                | 48.1                 |
| A7    | 124.3                | 51.5                 |
| A8    | 135.8                | 57.1                 |
| A9    | 117.5                | 55.2                 |
| A10   | 114.5                | 52.6                 |
| A11   | 130.5                | 65.6                 |
| A12   | 134.2                | 72.9                 |
| A13   | 123.0                | 58.4                 |
| A14   | 129.5                | 64.1                 |
| A15   | 126.4                | 67.9                 |
| A16   | 137.7                | 71.7                 |
| A17   | 115.1                | 56.5                 |
| A18   | 131.4                | 66.8                 |
| A19   | 123.5                | 70.6                 |
| A20   | 138.5                | 69.3                 |
| A21   | 120.6                | 55.2                 |
| A22   | 131.2                | 61.2                 |
| A23   | 116.3                | 66.6                 |
| A24   | 136.8                | 68.5                 |
| A25   | 114.9                | 57.7                 |
| A26   | 133.0                | 63.8                 |
| A27   | 113.2                | 62.0                 |
| A28   | 126.7                | 61.7                 |
| A29   | 125.5                | 55.2                 |
| A30   | 126.0                | 59.1                 |
| A31   | 132.6                | 61.3                 |
| A32   | 121.1                | 55.3                 |
| A33   | 127.9                | 62.9                 |
| A34   | 120.0                | 64.1                 |
| A35   | 121.8                | 62.5                 |
| A36   | 120.0                | 68.5                 |
| A37   | 126.9                | 68.9                 |
| A38   | 127.0                | 65.3                 |

## 5 Intramolecular Interactions & Catalyst Strain

Analysis of ligand-ligand interaction differences between **TSoxo** and **IS** is carried out by separating N-donors coordinating to different Cu atoms and carrying out EDA for each pair of N-donors.

Table 5: Interaction energy differences between **TSoxo** and **IS**,  $\Delta E_{INT}$  ( $\omega$ B97X-D/srsc/6-311+G\*, kJ/mol), for **S1-S11**. Subscript 1 and 2 denote fragment 1 and 2, each composed of two N-donors connecting to the same Cu.  $\Delta E_{INT,total}$  is calculated via  $\Delta E_{INT,1} + \Delta E_{INT,2}$ .  $\Delta E_{INT}$  for the outliers for which the magnitudes of LFER deviations exceed 10 kJ/mol are highlighted in boldface.

| Index     | $X_{im}$                             | $\Delta E_{INT,1}$ | $\Delta E_{INT,2}$ | $\Delta E_{INT,total}$ |
|-----------|--------------------------------------|--------------------|--------------------|------------------------|
| <b>S1</b> | <b>N(CH<sub>3</sub>)<sub>2</sub></b> | <b>-27.1</b>       | <b>10.6</b>        | <b>-16.5</b>           |
| S2        | NHCH <sub>3</sub>                    | -5.8               | -4.9               | -10.7                  |
| <b>S3</b> | <b>NH<sub>2</sub></b>                | <b>-5.0</b>        | <b>-6.1</b>        | <b>-11.1</b>           |
| <b>S4</b> | <b>OH</b>                            | <b>-8.1</b>        | <b>-6.8</b>        | <b>-14.9</b>           |
| S5        | OCH <sub>3</sub>                     | -12.3              | -8.6               | -20.9                  |
| S6        | CH <sub>3</sub>                      | 1.0                | -15.5              | -14.5                  |
| S7        | H                                    | -5.6               | -4.8               | -10.4                  |
| <b>S8</b> | <b>CHO</b>                           | <b>-3.9</b>        | <b>-12.8</b>       | <b>-16.7</b>           |
| S9        | COOH                                 | -4.1               | -4.7               | -8.8                   |
| S10       | CF <sub>3</sub>                      | -0.2               | -5.1               | -5.3                   |
| S11       | NO <sub>2</sub>                      | -3.5               | -3.6               | -7.1                   |

## 6 Strain LFER: Compensation

Table 6 shows descriptors, interaction energy, and DFT barriers for one reference and seven bidentate N-donor **SI1-SI7** substituted dicopper systems. All descriptors are calculated for optimized bare catalysts while  $\Delta E_{INT}$  and  $\Delta E_{STR}$  are calculated by the difference between **TSoxo** and **IS**.  $R^2$  for the linear fit of  $\Delta E_{STR,LFER} - \Delta E_{STR,DFT}$  versus  $\Delta E_{INT,DFT}^\ddagger - \Delta E_{INT,DFT,ref}^\ddagger$  is 0.93 and the slope is unity. Geometries of these bidentate N-donor substituents are shown in Figure 2.

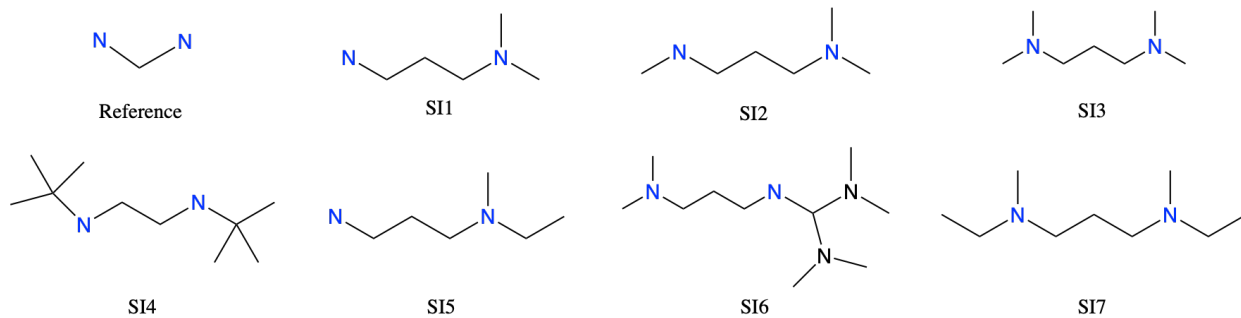

Figure 2: Geometries of eight bidentate N-donor substituent groups.

Table 6: Bite angles  $\theta$  ( $^\circ$ ) and Sterimol parameters B1 ( $\text{\AA}$ ),  $\Delta E_{INT}$ , difference between LFER and DFT-based ( $\omega$ B97X-D/srsc/6-311+G\*)  $\Delta E_{STR}$  for eight bidentate N-donor substituted catalysts including a reference system (barriers in kJ/mol)

| Index     | $\theta_1$ | $\theta_2$ | B1 <sub>1</sub> | B1 <sub>2</sub> | $\Delta E_{INT,DFT}^\ddagger - \Delta E_{INT,DFT,ref}^\ddagger$ | $\Delta E_{STR,LFER} - \Delta E_{STR,DFT}$ |
|-----------|------------|------------|-----------------|-----------------|-----------------------------------------------------------------|--------------------------------------------|
| Reference | 71.805     | 71.809     | 1.55            | 1.55            | 0.0                                                             | 0                                          |
| SI1       | 96.299     | 96.257     | 2.83            | 1.64            | 20.0                                                            | 15.0                                       |
| SI2       | 95.448     | 95.449     | 2.84            | 2.43            | 24.4                                                            | 17.2                                       |
| SI3       | 100.864    | 100.757    | 2.83            | 2.84            | 30.1                                                            | 29.3                                       |
| SI4       | 86.649     | 85.547     | 3.21            | 2.02            | 18.6                                                            | 13.5                                       |
| SI5       | 96.936     | 97.782     | 1.65            | 2.85            | 24.1                                                            | 16.0                                       |
| SI6       | 94.381     | 94.381     | 3.25            | 2.82            | 30.5                                                            | 25.7                                       |
| SI7       | 101.145    | 102.677    | 2.85            | 2.83            | 39.6                                                            | 34.6                                       |

## 7 Reference Analysis

LFER model predictions, in principle, must be independent of the choice of reference system. This is demonstrated in Table 7, where LFER 1 and 2 for amine groups ( $X_{am} = \text{OCH}_3, \text{CH}_3, \text{H}, \text{CF}_3, \text{NO}_2$ ), constructed with different references, are two identical LFERs with the same Hammett slope. When we utilize these to predict the reactivity for the systems examined in this study, the different intercepts and different references cancel out, resulting in identical predictions. Similarly, LFER 3 and 4 are the same with different references for imidazole groups ( $X_{im} = \text{OCH}_3, \text{CH}_3, \text{H}, \text{CF}_3, \text{NO}_2$ ). To match the form of the Taft equation where there is no intercept, we set intercept to 0 in the linear regression model and obtain LFER 5 and 6 with smaller MAE but a cost of slightly decreasing  $R^2$ . We note however that the choice of reference is critical to model construction. Our earlier study predicts poor model fit for an amine reference (LFERs 1, 2, or 5) reflected in the low  $R^2$  value. This leads to very large MAEs when applied to the systems examined here. We utilize LFER 6 as the interaction component of the LFER, described by Equation 7 in the main text.

Table 7: Analysis of linear regression model for two different references —  $X_{am} = H$  and  $X_{im} = H$ . The ‘group’ column refers to the N-donor variations employed in construction of the interaction term. The electronic LFERs for frozen monodentate complexes are established for amine and imidazole groups with mean absolute error (MAE) (kJ/mol) and coefficient determination ( $R^2$ ) calculated. LFER 1-4 are constructed without a fixed intercept in the linear regression model and LFER 5-6 are constructed with intercept set to zero.

| LFER index | Reference    | Group     | $-\log(k/k_{ref})$                      | MAE   | $R^2$ |
|------------|--------------|-----------|-----------------------------------------|-------|-------|
| 1          | $X_{am} = H$ | amine     | $-3.37 \sum_{i=1}^4 \sigma_{pi} + 1.46$ | 15.02 | 0.635 |
| 2          | $X_{im} = H$ | amine     | $-3.37 \sum_{i=1}^4 \sigma_{pi} - 4.68$ | 15.02 | 0.635 |
| 3          | $X_{am} = H$ | imidazole | $-2.28 \sum_{i=1}^4 \sigma_{pi} + 7.78$ | 3.70  | 0.873 |
| 4          | $X_{im} = H$ | imidazole | $-2.28 \sum_{i=1}^4 \sigma_{pi} - 0.23$ | 3.70  | 0.873 |
| 5          | $X_{am} = H$ | amine     | $-3.05 \sum_{i=1}^4 \sigma_{pi}$        | 14.07 | 0.589 |
| 6          | $X_{im} = H$ | imidazole | $-2.33 \sum_{i=1}^4 \sigma_{pi}$        | 3.55  | 0.871 |
